# Supplementary material for: A contemporary analysis of the Australian clinical and genetic landscape of spinal muscular atrophy: a registry based study
Source: PubMed Central journal article supplement — Lancet Reg Health West Pac. 2024 Nov 6;53:101237. doi: 10.1016/j.lanwpc.2024.101237 (PMC11570865; doi:10.1016/j.lanwpc.2024.101237), 2024-11-06
Supplement: mmc1.pdf [file mmc1.pdf]

**A CONTEMPORARY ANALYSIS OF THE AUSTRALIAN CLINICAL  
AND GENETIC LANDSCAPE OF SPINAL MUSCULAR ATROPHY:  
A REGISTRY BASED STUDY**

**SUPPLEMENTARY MATERIAL**

**Table of contents**

| <b>Table</b>           | <b>Title</b>                                            | <b>Page(s)</b> |
|------------------------|---------------------------------------------------------|----------------|
| Supplementary Table S1 | Variables analysed and excluded in the study            | 1 - 5          |
| Supplementary Table S2 | Characteristics of deceased individuals in the ANMDR    | 6              |
| Supplementary Table S3 | Multiple Imputation data – Imputed p-value descriptives | 7, 8           |

**SUPPLEMENTARY TABLE S1. VARIABLES ANALYSED AND EXCLUDED IN THE STUDY**

| <b>Variables analysed</b>                                                                                                                                                                                         |                           | <b>Variables excluded<br/>(missing data or non-contributory to the research question)</b> |
|-------------------------------------------------------------------------------------------------------------------------------------------------------------------------------------------------------------------|---------------------------|-------------------------------------------------------------------------------------------|
| <b>Variable</b>                                                                                                                                                                                                   | <b>Data available (%)</b> |                                                                                           |
| Age                                                                                                                                                                                                               | 100                       |                                                                                           |
| Sex                                                                                                                                                                                                               | 100                       | Other <i>SMN1</i> variants                                                                |
| Diagnosis through screening or other                                                                                                                                                                              | 100                       | Genetic test method for <i>SMN1</i>                                                       |
| <i>SMN1</i> variant                                                                                                                                                                                               | 100                       | Genetic test method for <i>SMN2</i>                                                       |
| <i>SMN2</i> copy number                                                                                                                                                                                           | 54.3                      | Is variant c.859G>C present in <i>SMN2</i> gene?                                          |
| Other family members with SMA                                                                                                                                                                                     | 100                       | <i>SMN2</i> variant c.859G>C testing method                                               |
| SMA type                                                                                                                                                                                                          | 100                       | Other genetic test information                                                            |
| Scoliosis                                                                                                                                                                                                         | 100                       | Gestational age at birth                                                                  |
| Scoliosis surgery                                                                                                                                                                                                 | 100                       | Symptom onset period                                                                      |
| Scoliosis surgery technique                                                                                                                                                                                       | 100                       | Age at symptom onset                                                                      |
| Date of surgery                                                                                                                                                                                                   | 100                       | Date of last exam for growth parameters                                                   |
| Developmental milestones (head control, rolling to side, sitting unassisted, standing with and without assistance, walking with assistance, walking unassisted, walking 10 m without assistance, climbing stairs) | 100                       | Height/ length                                                                            |
| Loss of milestones – all the above                                                                                                                                                                                |                           | Method of height measurement                                                              |
| Wheelchair/mobility device use                                                                                                                                                                                    | 100                       | Other method of height measurement, specify                                               |
| Gastric or nasal tube fed?                                                                                                                                                                                        | 100                       | Weight (kg)                                                                               |
| Invasive ventilation                                                                                                                                                                                              | 100                       | Head circumference (cm)                                                                   |
| Non-invasive ventilation                                                                                                                                                                                          | 100                       | Contractures (shoulders, elbows, wrists, fingers, hips, knees, ankles, jaw)               |
| Disease-modifying therapy for SMA used? zolgensma, spinraza, evrysdi                                                                                                                                              | 100                       | Cobb angle                                                                                |
| Date of treatment for Zolgensma (MM-YYYY)                                                                                                                                                                         | 100                       | Age in years when milestones gained                                                       |
| Weight at start of Zolgensma treatment (kg)                                                                                                                                                                       | 100                       | Who observed first the milestone                                                          |
| Duration of systemic corticosteroid administration (for zolgensma)                                                                                                                                                | 100                       | Useful function of hands                                                                  |
| Spinraza used? And still taking spinraza?                                                                                                                                                                         | 100                       | Reaching overhead in sitting position                                                     |

|                                                                                                                                                                                                                               |      |                                                                                               |
|-------------------------------------------------------------------------------------------------------------------------------------------------------------------------------------------------------------------------------|------|-----------------------------------------------------------------------------------------------|
| Date of spinraza start (MM-YYYY) and end, if so                                                                                                                                                                               | 100  | Raising hands to mouth in a sitting position                                                  |
| Weight at start of Spinraza treatment (kg)                                                                                                                                                                                    | 100  | Wheelchair/mobility device use (choice=Currently, Part-time)                                  |
| Spinraza reason for stopping                                                                                                                                                                                                  | 100  | Wheelchair/mobility device use (choice=No (currently UNDER 2 years of age))                   |
| Small molecule drug used? And still taking?                                                                                                                                                                                   | 100  | Wheelchair/mobility device use (choice=Previously, Part-time (specify age started & stopped)) |
| Date of risdiplam start (MM-YYYY)                                                                                                                                                                                             | 100  | Wheelchair/mobility device use (choice=Previously, Full-time (specify age started & stopped)) |
| Weight at risdiplam start (kg)                                                                                                                                                                                                | 100  | Age started CURRENT Full-Time wheelchair use in years and months                              |
| Clinicians seen in the last 6 months (neurologist)                                                                                                                                                                            | 100  |                                                                                               |
| Multidisciplinary clinic visit in the last 6 months                                                                                                                                                                           | 100  | Gastric or nasal tube fed, currently or previously exclusively                                |
| Physiotherapist seen in the last 6 months                                                                                                                                                                                     | 100  | Gastric or nasal tube fed, currently or previously supplemented                               |
| General practitioner seen in the last 6 months                                                                                                                                                                                | 100  | Volume of previous exclusive nutrition in millilitre (mL)                                     |
| Rehabilitation specialist seen in the last 6 months (occupational therapist, speech therapist, dietician, orthotist, hydrotherapist, chiropractor)                                                                            | 82   | Frequency of previous exclusive nutrition                                                     |
| Specify other therapist seen in the last 6 months (gynaecologist, endocrinologist, psychologist, urologist, etc)                                                                                                              | 82   | Caloric intake of previous exclusive nutrition in kilojoules (kJ)                             |
| Were rehabilitative interventions undertaken in the last 12 months or since last update? Stretches, respiratory physiotherapy program, massages, home program, hydrotherapy, occupational therapy sessions, braces/ orthotics | 100  | Previously supplementary tube fed, start date (MM-YYYY)                                       |
| Number of elective hospital admissions in the last 12 months or since last registry update                                                                                                                                    | 86·6 | Previously supplementary tube fed, stop date (MM-YYYY)                                        |
| PGI-S (Patient/Parent Global Impression of Severity) - How affected are you/your child now by SMA? and date                                                                                                                   | 91·1 | Volume of previous supplementary nutrition in millilitre (mL)                                 |
| PGI-I (Patient/Parent Global Impression of Improvement) - How do you feel you/your child's condition has changed in last 6 months? and date                                                                                   | 91·1 | Frequency of previous supplementary nutrition                                                 |
|                                                                                                                                                                                                                               |      | Caloric intake of previous supplementary nutrition in kilojoules (kJ)                         |
|                                                                                                                                                                                                                               |      | Current exclusive tube feeding, start date (MM-YYYY)                                          |
|                                                                                                                                                                                                                               |      | Volume of current exclusive nutrition in millilitre (mL)                                      |
|                                                                                                                                                                                                                               |      | Frequency of current exclusive nutrition                                                      |
|                                                                                                                                                                                                                               |      | Caloric intake of current exclusive nutrition in kilojoules (kJ)                              |
|                                                                                                                                                                                                                               |      | Current supplementary tube feeding, start date (MM-YYYY)                                      |
|                                                                                                                                                                                                                               |      | Volume of current supplementary nutrition in millilitre (mL)                                  |
|                                                                                                                                                                                                                               |      | Volume of current supplementary nutrition in millilitre (mL)                                  |
|                                                                                                                                                                                                                               |      | Caloric intake of current supplementary nutrition in kilojoules (kJ)                          |
|                                                                                                                                                                                                                               |      | Frequency of invasive ventilation previously                                                  |

|  |  |                                                                                                                               |
|--|--|-------------------------------------------------------------------------------------------------------------------------------|
|  |  | Frequency of invasive ventilation currently                                                                                   |
|  |  | Date started invasive ventilation previously (MM-YYYY)                                                                        |
|  |  | Date stopped invasive ventilation previously (MM-YYYY)                                                                        |
|  |  | Date started invasive ventilation currently (MM-YYYY)                                                                         |
|  |  | Assistance in airway clearance and/or secretion mobilisation, specify type & frequency of use                                 |
|  |  | Suction used? & Frequency of use?                                                                                             |
|  |  | Chest percussion used? & Frequency of use?                                                                                    |
|  |  | IPPV (intermittent positive-pressure ventilation) used? & Frequency of use?                                                   |
|  |  | Cough Assist device used? & Frequency of use?                                                                                 |
|  |  | IPPV (intermittent positive-pressure ventilation) used? & Frequency of use?                                                   |
|  |  | Other pulmonary assistance used? & Frequency of use? Please specify                                                           |
|  |  | Specify other type of pulmonary assistance                                                                                    |
|  |  | Forced Vital Capacity (FVC) testing                                                                                           |
|  |  | FVC date of test (MM-YYYY)                                                                                                    |
|  |  | FVC litre (L)                                                                                                                 |
|  |  | FVC predicted percentage (%)                                                                                                  |
|  |  | Peak Cough Flow (PCF) testing                                                                                                 |
|  |  | PCF date of test (MM-YYYY)                                                                                                    |
|  |  | Zolgensma dosage given                                                                                                        |
|  |  | Zolgensma route of administration                                                                                             |
|  |  | Name of corticosteroid (for Zolgensma treatment)                                                                              |
|  |  | Date of anti-AAV9 antibody test (for Zolgensma treatment) (MM-YYYY)                                                           |
|  |  | Number of days anti-AAV9 antibody test performed before Zolgensma treatment                                                   |
|  |  | Anti-AAV9 antibody test result (for Zolgensma treatment)                                                                      |
|  |  | Spinraza dosage given                                                                                                         |
|  |  | Spinraza frequency of dosage (every x day(s)/month(s)/years(s))                                                               |
|  |  | Spinraza route of administration                                                                                              |
|  |  | Spinraza following recommended dosing schedule                                                                                |
|  |  | Spinraza reason not following dosing schedule                                                                                 |
|  |  | Risdiplam dosage given                                                                                                        |
|  |  | Risdiplam frequency of dosage (every x day(s)/month(s)/years(s))                                                              |
|  |  | Risdiplam route of administration                                                                                             |
|  |  | Risdiplam following recommended dosing schedule                                                                               |
|  |  | Allopathic drugs prescribed in the last 12 months (or since last registry update if that is less than 12 months ago), specify |
|  |  | Vitamin D (bone health) and start date                                                                                        |
|  |  | Calcium (bone health) and start date                                                                                          |
|  |  | Bisphosphonate (bone health) and start date as above                                                                          |
|  |  | Drugs for gastroesophageal reflux                                                                                             |
|  |  | Drugs for constipation                                                                                                        |
|  |  | Antibiotics (for respiratory health)                                                                                          |
|  |  | Anticholinergic (for respiratory health)                                                                                      |
|  |  | Influenza immunisation (yes=ongoing)                                                                                          |
|  |  | Pneumococcal immunisation (yes=ongoing)                                                                                       |

|  |                                                                                                                                                                                                                                                                                                                                                                                                                                                                                                                                                                                                                                                                                                                                                                                                                                                                                                                                                                                                                                                                                                                                                                                                                                                                                                                                                                                                                                                                                             |
|--|---------------------------------------------------------------------------------------------------------------------------------------------------------------------------------------------------------------------------------------------------------------------------------------------------------------------------------------------------------------------------------------------------------------------------------------------------------------------------------------------------------------------------------------------------------------------------------------------------------------------------------------------------------------------------------------------------------------------------------------------------------------------------------------------------------------------------------------------------------------------------------------------------------------------------------------------------------------------------------------------------------------------------------------------------------------------------------------------------------------------------------------------------------------------------------------------------------------------------------------------------------------------------------------------------------------------------------------------------------------------------------------------------------------------------------------------------------------------------------------------|
|  | <p>Creatine (supplement)</p> <p>Acetyl-L-carnitine (supplement)</p> <p>Phenylbutyrate (supplement)</p> <p>Gabapentin (supplement)</p> <p>Thyrotropin-releasing hormone (supplement)</p> <p>Hydroxyurea (supplement)</p> <p>Valproate</p> <p>Albuterol/Salbutamol</p> <p>Other allopathic drug 1-3, specify</p> <p>Hospitalised or presented to emergency in the last 12 months or since last registry update if that is less than 12 months ago, specify details planned visits then acute/emergency</p> <p>Planned hospital admissions in the past 12 months, reason(s) for admission, number of days of stay, 1 - 10</p> <p>Number of acute hospital visits (including if presented at ER but not admitted) in the last 12 months or since last registry update if that is less than 12 months ago</p> <p>Acute 1 – 10; presented to emergency/ admitted; reason for visit, number of nights in hospital</p> <p>In addition to hospitalisations already reported, has the patient been diagnosed with any other comorbidities in the last 12 months or since last registry update if that is less than 12 months ago, specify</p> <p>Number of additional comorbidities (1 to 6) – COVID 19, cardiac diagnoses, etc.,. Start and end dates, ongoing?</p> <p>Participation in clinical drug trials</p> <p>Was a validated motor measure taken in the last 12 months or since last registry update if that is less than 12 months ago</p> <p>Why wasn't a validated motor measure taken</p> |
|  | <p>Specify injury / acute injury / illness that meant that validated motor measure was not taken</p> <p>CHOP-INTEND, date, score</p> <p>HFMSE (Hammersmith Functional Motor Scale Expanded), date, score as above</p> <p>RHS (Revised Hammersmith Scale)</p> <p>HINE Section 2</p> <p>WHO Motor Milestones</p> <p>9HPT (9-Hole Peg Test) – R &amp; L hand</p> <p>BBT (Box &amp; Blocks Test) – R &amp; L hand</p> <p>RULM (Revised Upper Limb Module)</p> <p>Brooke (Brooke Scale of upper extremity function)</p> <p>Revised Brooke</p> <p>MFM (Motor Function Measure)</p> <p>6MWT (Six-Minute Walk Test)</p> <p>10MWT (Ten-Metre Walk Test)</p> <p>TUG (Timed Up &amp; Go Test)</p> <p>EK2 (Egen Klassifikation)</p> <p>CHOP-ATEND</p> <p>Other validated measure 1-4, (specify)</p> <p>Dominant hand</p> <p>CGI-S (Clinician Global Impression of Severity) and date</p>                                                                                                                                                                                                                                                                                                                                                                                                                                                                                                                                                                                                                |

|  |                                                                                                                                                |
|--|------------------------------------------------------------------------------------------------------------------------------------------------|
|  | CGI-I (Clinician Global Impression of Improvement) - How does clinician feel you/your child's condition has changed in last 6 months? and date |
|  | Zarit Burden Interview (ZBI), score, date (MM-YYYY)                                                                                            |
|  | Other validated PRO taken                                                                                                                      |
|  | PedsQL 3.0 (neuromuscular module), scores and dates                                                                                            |
|  | PEDI-CAT                                                                                                                                       |
|  | SMA FRS                                                                                                                                        |
|  | ACEND                                                                                                                                          |
|  | ACTIVLIM                                                                                                                                       |
|  | DISABKIDS                                                                                                                                      |
|  | FSS                                                                                                                                            |
|  | Other validated PRO, specify                                                                                                                   |
|  | CMAP (Compound Muscle Action Potential) scan                                                                                                   |
|  | DEXA (Dual Energy X-ray Absorptiometry) scan                                                                                                   |
|  | Muscle imaging                                                                                                                                 |

**SUPPLEMENTARY TABLE S2: CHARACTERISTICS OF DECEASED INDIVIDUALS IN THE ANMDR**

| <b>SMA phenotype</b> | <b>Functional status</b> | <b>Age at death (years)</b> | <b>Year of death*</b> | <b>Sex</b> | <b>SMN1 pathogenic variant</b>                                 | <b>Number of SMN2 copies</b> | <b>Clinical sequelae of weakness</b>                                                                                                                | <b>SMN-augmenting therapy</b> | <b>Other clinical characteristics</b>                |
|----------------------|--------------------------|-----------------------------|-----------------------|------------|----------------------------------------------------------------|------------------------------|-----------------------------------------------------------------------------------------------------------------------------------------------------|-------------------------------|------------------------------------------------------|
| Type 0               | Non-sitter               | 0-2                         | 2021                  | Female     | Compound heterozygous deletion and pathogenic sequence variant | 1                            | Invasive ventilation 24 hours/day<br>Exclusive nasogastric feeding                                                                                  | No                            | Preterm birth (34 weeks); prenatal onset of symptoms |
| Type 1               | Non-sitter               | 0-4                         | 2022                  | Male       | Compound heterozygous deletion and pathogenic sequence variant | 2                            | Exclusive nasogastric feeding from age 1 month                                                                                                      | No                            | Palliative care from age 3 months                    |
| Type 1               | Non-sitter               | 1-0                         | 2020                  | Female     | Homozygous pathogenic sequence variants                        | 2                            | Non-invasive ventilation – not used<br>Exclusive nasogastric feeding from age 7 months                                                              | No                            | Palliative care from age 5 months                    |
| Type 1               | Non-sitter               | 9-2                         | 2021                  | Male       | Homozygous deletion of exon 7                                  | 3                            | Non-invasive ventilation & feeding support – not used<br>Scoliosis, requiring surgery (growing rods) at age 8 years                                 | Commenced at age 6 years      |                                                      |
| Type 2               | Non-sitter               | 11-9                        | 2022                  | Male       | Homozygous deletion of exon 7                                  | Not known                    | Non-invasive ventilation <16 hours/day from age 6 years<br>Feeding support – not used<br>Scoliosis, requiring surgery (arthrodesis) at age 9-5years | No                            |                                                      |

\*SMN-augmenting therapies were available during this period in Australia

**SUPPLEMENTARY TABLE S3: MULTIPLE IMPUTATION DATA - IMPUTED P-VALUE DESCRIPTIVES**

| <b>1. Association between SMA type and <i>SMN2</i> copy numbers</b>                                                                                                                                                                     |                         |
|-----------------------------------------------------------------------------------------------------------------------------------------------------------------------------------------------------------------------------------------|-------------------------|
| 1.1 Homozygous deletion of exon 7 of <i>SMN1</i> : Significant relationship between <i>SMN2</i> copy number and SMA type (p<0.0001, Fisher's exact test); all imputed values <0.0001                                                    |                         |
| Minimum                                                                                                                                                                                                                                 | 6.1 x 10 <sup>-24</sup> |
| Median                                                                                                                                                                                                                                  | 2.2 x 10 <sup>-20</sup> |
| Maximum                                                                                                                                                                                                                                 | 9.8 x 10 <sup>-18</sup> |
| 1.2 Compound heterozygosity/ biallelic sequence variants in <i>SMN1</i> : No significant relationship between <i>SMN2</i> copy numbers and SMA type (p=0.21, Fisher's exact test); imputed mean p=0.1282424; all imputed p-values >0.05 |                         |
| Minimum                                                                                                                                                                                                                                 | 0.055                   |
| Median                                                                                                                                                                                                                                  | 0.055                   |
| Maximum                                                                                                                                                                                                                                 | 0.21                    |
| <b>2. Clinical outcomes</b>                                                                                                                                                                                                             |                         |
| 2.1 PGI-S*: No significant association between PGI-s and utilisation of therapies (p=0.792, Fisher's exact test); imputed mean p=0.7452292; all imputed p-values >0.05                                                                  |                         |
| Minimum                                                                                                                                                                                                                                 | 0.62                    |
| Median                                                                                                                                                                                                                                  | 0.75                    |
| Maximum                                                                                                                                                                                                                                 | 0.86                    |

|                                                                                                                                             |                         |
|---------------------------------------------------------------------------------------------------------------------------------------------|-------------------------|
| 2.2 PGI-I#: Significant relationship between PGI-I and utilisation of therapies (p<0.0001, Fisher's exact test); all imputed p-values <0.05 |                         |
| Minimum                                                                                                                                     | 4.86 x 10 <sup>-9</sup> |
| Median                                                                                                                                      | 3.10 x 10 <sup>-8</sup> |
| Maximum                                                                                                                                     | 8.25 x 10 <sup>-8</sup> |

\*PGI-S: Patient/parent Global Impression of Severity

#PGI-I: Patient/parent Global Impression of Improvement
